# Supplementary material for: Embarrassing Exposures in Online Social Networks: An Integrated Perspective of Privacy Invasion and Relationship Bonding
Source: Atypon-hosted journal article supplement (doi:10.1287/isre.2015.0602), 2015-12-01
Supplement: isre.2015.0602-sm-online-supplement.pdf [file isre.2015.0602-sm-online-supplement.pdf]

Online Supplement: Appendix A

Correlation Matrix

|     | ID     | NM     | AGE   | GEN   | DPC   | SOC   | IE    | FE     | FUI   | PPI    | PRB    | IN      | TA    | IA    | APP  |
|-----|--------|--------|-------|-------|-------|-------|-------|--------|-------|--------|--------|---------|-------|-------|------|
| ID  | 1.00   |        |       |       |       |       |       |        |       |        |        |         |       |       |      |
| NM  | -0.03  | 1.00   |       |       |       |       |       |        |       |        |        |         |       |       |      |
| AGE | -0.01  | -0.01  | 1.00  |       |       |       |       |        |       |        |        |         |       |       |      |
| GEN | 0.01   | 0.05   | 0.08  | 1.00  |       |       |       |        |       |        |        |         |       |       |      |
| DPC | 0.04   | -0.05  | -0.04 | 0.02  | 1.00  |       |       |        |       |        |        |         |       |       |      |
| SOC | -0.05  | 0.07   | 0.08  | 0.09  | 0.02  | 1.00  |       |        |       |        |        |         |       |       |      |
| IE  | -0.09  | 0.11   | -0.06 | 0.02  | 0.11  | 0.22  | 1.00  |        |       |        |        |         |       |       |      |
| FE  | 0.08   | 0.11   | 0.08  | 0.06  | 0.27  | 0.08  | 0.20  | 1.00   |       |        |        |         |       |       |      |
| FUI | 0.06   | 0.11   | 0.13  | 0.10  | 0.19  | 0.16  | 0.13  | 0.73** | 1.00  |        |        |         |       |       |      |
| PPI | 0.47** | 0.41** | 0.22  | 0.07  | -0.06 | -0.02 | -0.05 | 0.20   | 0.13  | 1.00   |        |         |       |       |      |
| PRB | 0.18   | 0.48** | -0.17 | 0.01  | 0.02  | 0.07  | 0.01  | 0.07   | 0.08  | -0.05  | 1.00   |         |       |       |      |
| IN  | -0.29* | -0.36* | 0.06  | -0.14 | 0.04  | -0.21 | 0.01  | -0.14  | 0.17  | -0.28* | -0.36* | 1.00    |       |       |      |
| TA  | 0.36*  | -0.07  | 0.12  | 0.05  | 0.03  | -0.22 | -0.14 | 0.20   | -0.16 | 0.43** | -0.30* | -0.02   | 1.00  |       |      |
| IA  | 0.25*  | -0.29* | -0.05 | 0.16  | 0.15  | 0.13  | -0.07 | 0.13   | -0.14 | 0.26*  | -0.34* | -0.23*  | 0.35* | 1.00  |      |
| APP | 0.15   | 0.19   | -0.16 | -0.12 | 0.06  | -0.14 | -0.12 | 0.14   | -0.02 | -0.37* | 0.44** | -0.45** | -0.17 | -0.13 | 1.00 |

Notes

N = 109

ID = information dissemination; NM = network mutuality; AGE = age; GEN = gender; DPC = dispositional privacy concerns; SOC = sociability; IE = Internet experience; FE = Facebook experience; FUI = Facebook usage experience; PPI = perceived privacy invasion; PRB = perceived relationship bonding; IN = inaction; TA = transactional avoidance; IA = interpersonal avoidance; APP = approach.

\* $p < 0.05$ , \*\* $p < 0.01$

Online Supplement: Appendix B

Logistic Regression

| Covariates                            | Dependent Variable |                   |                   |                   |
|---------------------------------------|--------------------|-------------------|-------------------|-------------------|
|                                       | Model A            | Model B           | Model C           | Model D           |
| <b>Dispositional Privacy Concerns</b> |                    |                   |                   |                   |
| Estimate                              | 0.06               | 0.05              | 0.44              | 0.06              |
| Significance                          | $p = 0.79$ (N.S.)  | $p = 0.82$ (N.S.) | $p = 0.13$ (N.S.) | $p = 0.83$ (N.S.) |
| 95% CI                                | (0.69, 1.64)       | (-0.38, 0.48)     | (-0.13, 1.01)     | (-0.51, 0.64)     |
| <b>Sociability</b>                    |                    |                   |                   |                   |
| Estimate                              | -0.24              | -0.54             | 0.14              | -0.57             |
| Significance                          | $p = 0.35$ (N.S.)  | $p = 0.08$ (N.S.) | $p = 0.65$ (N.S.) | $p = 0.07$ (N.S.) |
| 95% CI                                | (0.47, 1.30)       | (-1.04, -0.05)    | (-0.47, 0.76)     | (-1.19, 0.05)     |
| <b>Facebook Experience</b>            |                    |                   |                   |                   |
| Estimate                              | -0.66              | 0.19              | 0.13              | 0.29              |
| Significance                          | $p = 0.07$ (N.S.)  | $p = 0.54$ (N.S.) | $p = 0.70$ (N.S.) | $p = 0.60$ (N.S.) |
| 95% CI                                | (0.26, 1.05)       | (-0.41, 0.79)     | (-0.54, 0.80)     | (-0.78, 1.36)     |
| <b>Facebook Usage Intensity</b>       |                    |                   |                   |                   |
| Estimate                              | 0.23               | -0.24             | -0.43             | -0.54             |
| Significance                          | $p = 0.44$ (N.S.)  | $p = 0.41$ (N.S.) | $p = 0.23$ (N.S.) | $p = 0.24$ (N.S.) |
| 95% CI                                | (0.71, 2.23)       | (-0.81, 0.33)     | (-1.11, 0.26)     | (-1.46, 0.37)     |

Notes:

Model A: DV = Inaction (IN)

Model B: DV = Transactional Avoidance (TA)

Model C: DV = Interpersonal Avoidance (IA)

Model D: DV = Approach (AP)

Online Supplement: Appendix C

|                                       | Dependent Variable |                   |            |            |                   |            |            |                   |            |
|---------------------------------------|--------------------|-------------------|------------|------------|-------------------|------------|------------|-------------------|------------|
|                                       | Model A            | Model B           |            |            | Model C           |            |            | Model D           |            |
| <b>Parallel Lines Test</b>            |                    |                   |            |            |                   |            |            |                   |            |
| Chi-Square                            |                    | 7.68              |            |            | 4.77              |            |            | 5.97              |            |
| Degrees of Freedom                    |                    | 12                |            |            | 12                |            |            | 6                 |            |
| Significance                          |                    | $p = 0.77$ (N.S.) |            |            | $p = 0.97$ (N.S.) |            |            | $p = 0.43$ (N.S.) |            |
| <b>Model Fit</b>                      |                    |                   |            |            |                   |            |            |                   |            |
| Likelihood Ratio Chi-Square           | 43.53              | 67.92             |            |            | 27.85             |            |            | 42.96             |            |
| Degrees of Freedom                    | 6                  | 6                 |            |            | 6                 |            |            | 6                 |            |
| Significance                          | $p < 0.01$         | $p < 0.01$        |            |            | $p < 0.01$        |            |            | $p < 0.01$        |            |
| Cox & Snell                           | 0.33               | 0.46              |            |            | 0.23              |            |            | 0.33              |            |
| <b>Covariates-only</b>                |                    |                   |            |            |                   |            |            |                   |            |
| Cox & Snell                           | 0.08               | 0.04              |            |            | 0.02              |            |            | 0.02              |            |
| <b>Threshold</b>                      |                    |                   |            |            |                   |            |            |                   |            |
|                                       |                    | TA = 0            | TA = 1     | TA = 2     | IA = 0            | IA = 1     | IA = 2     | AP = 0            | AP = 1     |
| Estimate                              |                    | 2.29              | 3.78       | 5.25       | 2.34              | 2.96       | 5.11       | 3.46              | 4.18       |
| Standard Error                        |                    | 1.16              | 1.21       | 1.30       | 0.35              | 0.41       | 0.95       | 0.89              | 0.92       |
| Wald Chi-Square                       |                    | 3.92              | 9.74       | 16.33      | 34.23             | 42.54      | 36.45      | 25.13             | 29.45      |
| Significance                          |                    | $p < 0.05$        | $p < 0.01$ | $p < 0.01$ | $p < 0.01$        | $p < 0.01$ | $p < 0.01$ | $p < 0.01$        | $p < 0.01$ |
| <b>95% CI</b>                         |                    |                   |            |            |                   |            |            |                   |            |
| Lower Bound                           |                    | 1.98              | 1.41       | 2.70       | 1.55              | 2.24       | 3.42       | 2.04              | 4.25       |
| Upper Bound                           |                    | 2.56              | 6.15       | 7.79       | 3.10              | 3.88       | 5.35       | 2.86              | 6.88       |
| <b>Predictors</b>                     |                    |                   |            |            |                   |            |            |                   |            |
| <b>Perceived Privacy Invasion</b>     |                    |                   |            |            |                   |            |            |                   |            |
| Estimate                              | -0.78              | 2.90              |            |            | 0.71              |            |            | -1.17             |            |
| Standard Error                        | 0.30               | 0.58              |            |            | 0.36              |            |            | 0.78              |            |
| Wald Chi-Square                       | 6.86               | 16.33             |            |            | 3.95              |            |            | 5.46              |            |
| Significance                          | $p < 0.01$         | $p < 0.01$        |            |            | $p = 0.23$ (N.S.) |            |            | $p < 0.05$        |            |
| Odds-Ratio                            | 0.46               | 18.17             |            |            | 2.03              |            |            | 0.31              |            |
| <b>95% CI</b>                         |                    |                   |            |            |                   |            |            |                   |            |
| Lower Bound                           | -2.82              | 1.56              |            |            | 0.02              |            |            | -2.13             |            |
| Upper Bound                           | -1.25              | 3.98              |            |            | 1.62              |            |            | -1.20             |            |
| <b>Perceived Relationship Bonding</b> |                    |                   |            |            |                   |            |            |                   |            |
| Estimate                              | -1.45              | -0.62             |            |            | -1.01             |            |            | 3.24              |            |
| Standard Error                        | 0.31               | 0.23              |            |            | 0.32              |            |            | 0.78              |            |
| Wald Chi-Square                       | 21.97              | 7.36              |            |            | 9.62              |            |            | 17.29             |            |
| Significance                          | $p < 0.01$         | $p < 0.01$        |            |            | $p < 0.05$        |            |            | $p < 0.01$        |            |
| Odds-Ratio                            | 0.23               | 0.54              |            |            | 0.36              |            |            | 25.53             |            |
| <b>95% CI</b>                         |                    |                   |            |            |                   |            |            |                   |            |
| Lower Bound                           | -2.43              | -1.94             |            |            | -3.13             |            |            | 1.72              |            |
| Upper Bound                           | -1.12              | -1.15             |            |            | -1.65             |            |            | 4.77              |            |

Notes:

- Model A: DV = Inaction (IN), Model B: DV = Transactional Avoidance (TA), Model C: DV = Interpersonal Avoidance (IA), Model D: DV = Approach (AP)
- The four models are computed with covariates (see Online Supplement: Appendix B).
- Model B, C, and D are computed based on the entire dataset (N=109). Results are consistent with analyses conducted based on subjects who had performed active responses (N = 72).

Online Supplement: Appendix D

Test for Mediating Effects

|     | Model 1 |         | Model 2 |         |        |         | Model 3                     |                             |                             |                             |
|-----|---------|---------|---------|---------|--------|---------|-----------------------------|-----------------------------|-----------------------------|-----------------------------|
|     | PPI     | PRB     | IN      | TA      | IA     | AP      | IN                          | TA                          | IA                          | AP                          |
| ID  | 0.45**  | -0.58** | -1.52** | 1.58**  | 1.45*  | -2.08** | -0.56<br>( <i>p</i> = 0.18) | 0.71<br>( <i>p</i> = 0.27)  | 0.09<br>( <i>p</i> = 0.91)  | -0.66<br>( <i>p</i> = 0.48) |
| NC  | -1.99** | -0.25** | -1.83** | -1.62** | -1.46* | 1.49**  | -0.49<br>( <i>p</i> = 0.51) | -1.24<br>( <i>p</i> = 0.18) | -0.03<br>( <i>p</i> = 0.98) | 0.13<br>( <i>p</i> = 0.92)  |
| PPI | -       | -       | -       | -       | -      | -       | -0.77*                      | 2.74**                      | 0.75<br>( <i>p</i> = 0.10)  | -1.06*                      |
| PRB | -       | -       | -       | -       | -      | -       | -1.38**                     | -0.57*                      | -0.98*                      | 3.18**                      |

Notes:

PPI = perceived privacy invasion; PRB = perceived relationship bonding; IN = inaction; TA = transactional avoidance; IA = interpersonal avoidance; AP = approach.

Model 1: Relationships between the independent variables and mediating variables

Model 2: Relationships between the independent variables and dependent variables

Model 3: Full model

\*  $p < 0.05$ , \*\*  $p < 0.01$
